# 1 Non-equilibrium conditions inside rock pores drive fission, maintenance and 2 selection of coacervate protocells

3 Alan Ianeselli<sup>1,2</sup>, Damla Tetiker<sup>1</sup>, Julian Stein<sup>1,2</sup>, Alexandra Kühnlein<sup>1,2</sup>, Christof Mast<sup>1,2</sup>, Dieter Braun<sup>\*,1,2</sup> and  
4 T-Y Dora Tang<sup>\*,3</sup>

5 <sup>1</sup>Systems Biophysics, Ludwig Maximilian University Munich, Amalienstraße 54, 80799 München, Germany

6 <sup>2</sup>Center for NanoScience (CeNS), Ludwig Maximilian University, Amalienstraße 54, 80799 München, Germany

7 <sup>3</sup>Max-Planck Institute for Molecular Cell Biology and Genetics, Pfotenhauerstraße 108, 01307 Dresden, Germany

8 \*Corresponding authors: [tang@mpi-cbg.de](mailto:tang@mpi-cbg.de), [dieter.braun@lmu.de](mailto:dieter.braun@lmu.de)

9

10

## 11 Abstract

12 Key requirements for the first cells on Earth include the ability to compartmentalize and evolve.  
13 Compartmentalization spatially localizes biomolecules from a dilute pool and an evolving cell which grows  
14 and divides permits mixing and propagation of information to daughter cells. Complex coacervate micro-  
15 droplets are excellent candidates as primordial cells with the ability to partition and concentrate  
16 molecules into their core and support primitive and complex biochemical reactions. However, the  
17 evolution of coacervate protocells by fusion, growth and fission has not yet been demonstrated. In this  
18 work, a primordial environment initiated the evolution of coacervate-based protocells. Gas bubbles inside  
19 heated rock pores perturb the coacervate protocell distribution and drive the growth, fusion, division and  
20 selection of coacervate microdroplets. This setting provides a primordial non-equilibrium environment.  
21 Our findings describe how common gas bubbles within heated rock pores induce the early evolution  
22 processes of coacervate-based protocells, providing a compelling scenario for the evolution of membrane-  
23 free coacervate microdroplets on the early Earth.

24

25

26

27

28

29

30

31

32

33

34

35

36

## 37 Introduction

38 Compartmentalization is a key feature of modern biological systems and has been hypothesized to play  
39 an important role during the origin of life by spatially localizing molecules and facilitating the first chemical  
40 reactions<sup>1,2</sup>. One viable route to compartmentalization is via liquid-liquid phase separation of oppositely  
41 charged polyelectrolytes in aqueous solution<sup>3</sup>. This process leads to the formation of membrane-free  
42 chemically enriched droplets. These coacervate microdroplets are intriguing protocell models as they  
43 form with little chemical identity under a broad range of physico-chemical conditions<sup>4</sup>; they localize and  
44 concentrate a range of different molecules<sup>5-7</sup> and exhibit molecular selectivity by partitioning<sup>8-10</sup>. In  
45 addition, coacervate droplets facilitate the assembly of fatty acid bilayers on their outer surface<sup>11</sup> and  
46 readily support catalytic reactions such as primitive RNA catalysis<sup>12,13,14</sup>. This provides a pathway to  
47 membrane bound compartmentalization as observed in modern biology and a connection to the RNA-  
48 peptide world hypothesis.

49 Fusion events, division and maintenance of coacervate protocells would have been essential for  
50 the evolution of compartmentalized molecules. Fusion and growth of protocells are necessary for the  
51 exchange of molecules and genetic material<sup>15</sup> and it has been shown that the incorporation of free  
52 components by direct fusion with other protocells<sup>16</sup> or by external electric fields<sup>17</sup> can be achieved in a  
53 laboratory setting. In solution, these coacervate droplets will tend to coalesce eventually forming a  
54 coacervate bulk macrophase<sup>18,19</sup> which limits their role as protocells. The division of coacervate protocells  
55 is required to transfer molecular information to succeeding daughter protocells that can pass evolutionary  
56 advantages to the next generation. To achieve division, modern cells make use of a complex machinery  
57 of regulatory proteins, scaffold proteins, enzymes and chemical messengers<sup>20</sup>. In the prebiotic world,  
58 division must have relied on other factors. Some studies suggest that division of lipid-based vesicles can  
59 be triggered by osmotic changes<sup>21</sup>, chemical changes<sup>22</sup>, temperature<sup>23</sup> and shearing forces<sup>24</sup>. In  
60 comparison, less is known about the division mechanisms of membrane-free coacervate-based protocells  
61 which are chemically enriched. One theoretical study predicts that budding of chemically active  
62 membrane free droplets is achieved by the flux of substrate and product across the interface which lies  
63 in a particular surface tension regime<sup>25</sup>. Despite this prediction, there has been no experimental  
64 realization of fission of membrane-free protocells with or without chemical input. Furthermore, it has still  
65 not experimentally shown how they would behave under prebiotically plausible non-equilibrium  
66 conditions.

67 To this end, pores in a thermal gradient provide a unique, facile and prebiotically feasible route  
68 to perturbing the system away from its equilibrium<sup>26</sup>. Here, capillary flows induced by heat fluxes within  
69 millimeter-sized pores have been shown to accumulate molecules based on their size at the gas-water  
70 interface of gas inclusions. Simulations and experiments show that there are two main forces acting at  
71 the interface: capillary flows from the cold to the warm side and perturbative fluxes after the precipitation  
72 of water<sup>27,28</sup>. These forces induced rapid movements of particles, driving their contact and fusion. Under  
73 these conditions, lipid molecules accumulate at the interface to create vesicular structures and undergo  
74 fission driven by Marangoni flows and convection. These previous studies indicate that the growth,  
75 division and maintenance of coacervate droplets could be manipulated by the physical flows within  
76 thermal pores.

77 Herein, we study the effect of out-of-equilibrium conditions provided by heated pores containing  
78 gas bubbles, a common primordial scenario<sup>26</sup>, on the growth and division mechanisms of complex  
79 coacervate microdroplets formed by mixing polyanionic (carboxymethyl dextran (CM-Dex), adenosine  
80 5'-triphosphate (ATP)) and polycationic (poly-diallyl dimethylammonium (PDDA), poly-L-lysine (pLys))

81 species. Even though the coacervates in this study might not be generated from prebiotically relevant  
82 molecules they provide a robust model system for reconciling the general role of heat-induced out-of-  
83 equilibrium systems on coacervate microdroplets.

84 We show that the accumulation of coacervate forming components at the gas-water interface of  
85 the gas bubble<sup>28</sup> drives growth by fusion of the coacervate microdroplets. Droplets of up to 300  $\mu\text{m}$  in size  
86 are formed and maintained over time. This property is not observed under equilibrium conditions where  
87 droplets coalesce to eventually form a single coacervate macrophase (Figure S5.1)<sup>18,19</sup>. Intriguingly, the  
88 microfluidic water cycle induced by the thermal gradient<sup>27</sup> creates perturbative fluxes at the gas-water  
89 interface that lead to the fission and fragmentation of the coacervate droplets using purely physical  
90 processes (Figure 1a-c). This offers direct evidence that physical forces within a confined environment are  
91 sufficient to provide the mechanism of membrane-free protocell division without complex machinery or  
92 targeted chemical reactions. Furthermore, the environment provided the ability to create and select for  
93 separate populations of droplets with different chemical composition. Specifically, the out-of-equilibrium  
94 conditions were able to overcome the intrinsic preference of RNA to coacervate with pLys<sup>29</sup>, yielding  
95 RNA:pLys droplets also enriched with CM-Dex at the gas-water interface. In the bulk, the coacervate  
96 droplets were formed mainly by RNA and pLys. This means, the thermal gradient in combination with the  
97 gas bubble led to the creation and spatial segregation of two different populations of coacervate droplets  
98 with different composition: oligonucleotide:poly-peptide (RNA:pLys) coacervate droplets in the bulk and  
99 sugar:oligonucleotide:poly-peptide (CM-Dex:RNA:pLys) droplets at the gas-water interface.

100 We present the proposed mechanisms as a prebiotic model for membrane-free protocell growth,  
101 division, and evolution, since the only requirements are simple and ubiquitous physical conditions that  
102 could be found inside heated rock pores on the early Earth.

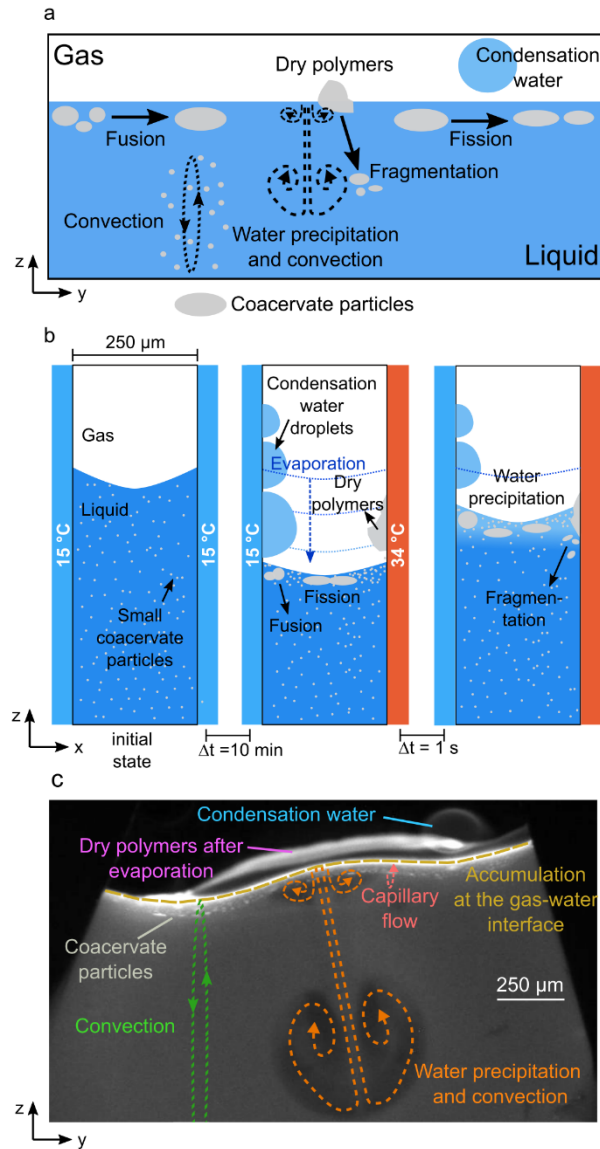

103

104 **Figure 1. Fusion, division and transport of coacervate protocells inside a thermal pore.** a) Scheme of coacervate  
 105 transport, accumulation, growth and division at the gas-water interface. b) (Left) no heating: pre-formed small  
 106 coacervate droplets in the bulk. (Center) temperature gradient: the droplets accumulate and fusion and fission are  
 107 observed. (Right) water precipitation drives coacervate fragmentation. c) Fluorescence image showing evaporation,  
 108 water condensation, wet-dry cycles, convection and capillary flows at the gas-water interface of the thermal pore.  
 109 Conditions for c) were: CM-Dex:PDDA total polymer concentration 2mM (molar ratio 6:1, [carboxy]/[amine] = 5) +  
 110 0.1% FITC-labeled CM-Dex, 10 mM MgCl<sub>2</sub>, 10 mM Tris pH 8, temperature gradient of 19 °C (hot side 34 °C, cold side  
 111 15 °C).

112

113

114

115

116 **Results**

117 **The gas-water interface accumulates coacervate droplets and facilitates fusion**

118 To characterize the effect of non-equilibrium perturbations on coacervate microdroplets, we  
119 experimentally recreated a heated rock pore filled with liquid and gas bubbles as described previously<sup>27,28</sup>.  
120 In brief, a PTFE sheet (250  $\mu\text{m}$  thick) cut with sharp triangular structures was placed between an optically  
121 transparent sapphire and a silica plate (Figure 2a). Liquids were loaded into the chamber through  
122 microfluidic tubings and gas bubbles were created by incomplete filling of the liquid into the triangular  
123 cavities (Figure 2b). The sample chamber was loaded onto a custom-built microscope (see Materials and  
124 Methods and supplementary section 1) and a temperature gradient was generated by differentially  
125 heating the sapphire with rod resistors inserted into a copper holder, and cooling the copper back plate  
126 through a connection to a water bath (Figure 2c-d). The temperature gradients were varied between 15  $^{\circ}\text{C}$   
127 to 29  $^{\circ}\text{C}$  with an accuracy of  $\pm 1$   $^{\circ}\text{C}$ . Imaging was provided through the transparent sapphire with the  
128 camera focused on the cold wall. This chamber is also referred to as a “thermal trap”.

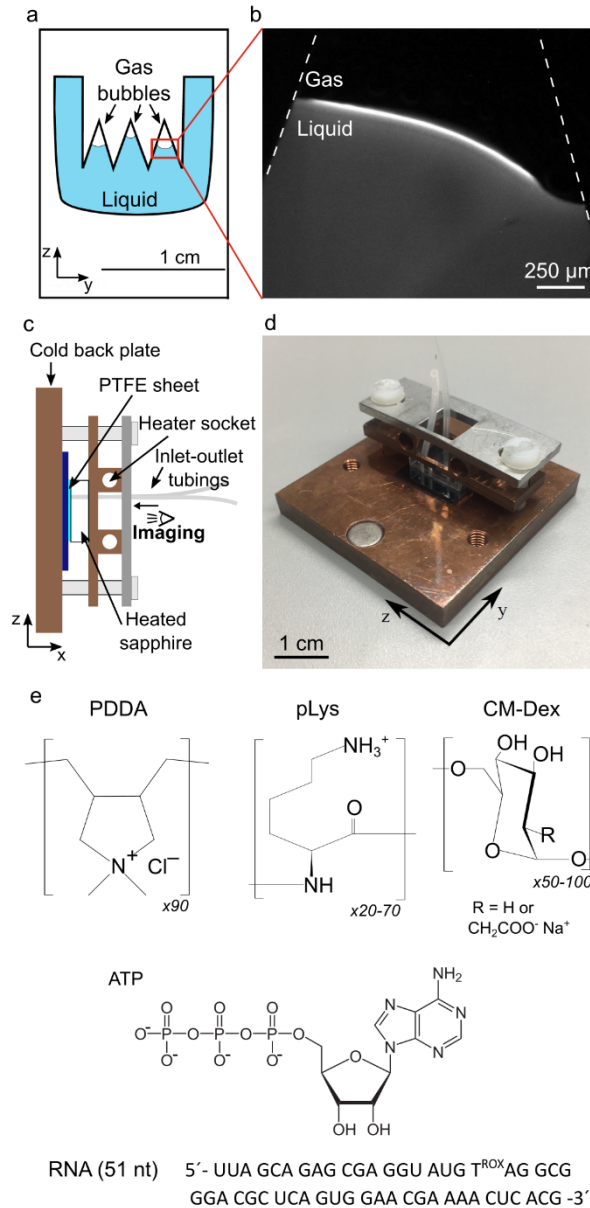

129

130 **Figure 2. Scheme of the thermal trap used in the experiments.** a) Scheme of the PTFE interspacer. The triangular  
 131 structures cause the formation of gas bubbles. b) Fluorescence image of the gas bubble in a temperature gradient  
 132 (CM-Dex:PDDA 6:1 molar ratio, [carboxy]/[amine] = 5 + 0.1% FITC-labeled CM-Dex, total conc 2 mM). Lateral sketch  
 133 (c) and photo (d) of the thermal trap. e) Chemical structure of the components used: PDDA (poly-diallyl  
 134 dimethylammonium chloride), pLys (poly-L-lysine), CM-Dex (carboxymethyl-dextran), ATP (adenosine triphosphate)  
 135 RNA sequence (51 nt).

136 Coacervate microdroplet dispersions were prepared by mixing negatively charged modified  
137 sugars carboxymethylated-dextran (CM-Dex, degree of polymerization between 50-100, with 1 carboxyl  
138 group every 3 repeats) or adenosine triphosphate (ATP) with positively charged polyelectrolytes, either  
139 poly-L-lysine (pLys, degree of polymerization of 20 to 70) or polydiallyldimethylammonium chloride (PDDA,  
140 degree of polymerization of 90) (Figure 2e). CM-Dex:PDDA and CM-Dex:pLys mixtures were prepared at  
141 molar ratios of 6:1 and 4:1, respectively, whilst ATP:PDDA and ATP:pLys droplets were prepared at  
142 4:1 molar ratio. The molar ratios correspond to a [carboxyl] to [amine] ratio of 5 (CM-Dex:PDDA) or 7  
143 (CM-Dex:pLys). Such ratios were optimized in previous works to yield a good amount of coacervation<sup>30,31</sup>.  
144 The total polymer concentrations were varied between 2 and 20 mM. The starting concentration dictated  
145 the density of coacervate droplets within the dispersion and the final amount of material accumulated at  
146 the gas-water interface. In order to visualize the coacervate droplets, we added 0.1% FITC labelled CM-  
147 Dex or pLys. The coacervate dispersions were prepared in either 0.1 M Na<sup>+</sup> bicine buffer pH 8.5, or 10  
148 mM Tris (pH 8) and 4 mM MgCl<sub>2</sub>. Control experiments showed that there was no appreciable difference  
149 between the two different buffers regarding the dynamics of the coacervate within the thermal trap (see  
150 supplementary section 2). Therefore, we used both buffers interchangeably throughout our experiments  
151 to highlight the generality of our findings.

152 Upon loading the coacervate dispersion (20 mM CM-Dex:PDDA in 0.1 M Na<sup>+</sup> bicine buffer, pH 8.5)  
153 into the thermal trap, microscopy images (taken every ~ 1 second) showed the presence of small  
154 coacervate droplets (< 10 μm) evenly dispersed throughout the chamber (see Figure 3a). After differential  
155 heating at the two sides of the trap (warm side 49 °C, cold side 20 °C), the fluorescent droplets experienced  
156 convective flows in the bulk of the solution. The speed of the convective flow could be modulated by the  
157 temperature difference as observed in previous simulations<sup>27</sup>. Interestingly, we saw that the coacervate  
158 droplets in the bulk solution were transported by the convection flow to the gas-water interface where  
159 they accumulated and started growing by fusion (Figure 3b-c and supplementary movie 1). At the interface  
160 the droplets moved parallel to the interface driving contact and coalescence events. An individual fusion  
161 process between two coacervate droplets required a few seconds (from 1 to 10 seconds) and resulted in  
162 elliptically-shaped coacervates. Figure 3d shows the process of fusion between 3 large coacervate  
163 droplets.

164 The growth of the coacervates over time was quantified from the optical microscopy images.  
165 Using LabVIEW, the average horizontal size was measured at different times (as depicted in Figure 3b).  
166 Analysis of the CM-Dex:PDDA coacervates reached a maximal average size of 150 μm. Experiments with  
167 a different buffer (10 mM Tris pH 8 and 4 mM MgCl<sub>2</sub>) or different polymers of different molecular weights  
168 (CM-Dex:pLys, ATP:pLys, ATP:PDDA or CM-Dex:pLys of higher molecular weight) showed comparable  
169 behavior with minor differences on the final coacervate size (Figure 3e and supplementary section 2).  
170 Note that in our analysis we only measured the horizontal size and not the whole volume of the coacervate  
171 droplet. Therefore, we believe that our method was not sensitive to small changes in size. This could be  
172 why there was no particular observable effect of the buffer or coacervate type on the final droplet size.  
173 However, the method was successful in calculating the average size distribution, as shown in Figure 3e  
174 and 5j.

175 In addition, we characterized the effect of total polymer concentration on the growth rate and  
176 the final size of the coacervate droplets by performing a series of experiments with a constant thermal  
177 gradient (hot side 49 °C and cold side 20 °C), buffer conditions (4 mM MgCl<sub>2</sub>, 10 mM Tris, pH 8.0)  
178 and polymers (CM-Dex:PDDA molar ratio 6:1, [carboxyl]/[amine] = 5), doped with 0.1 % FITC-labeled CM-  
179 Dex. The total polymer concentration was varied between 1 and 20 mM (a common concentration range

180 that was used in other studies<sup>12,18,32,33</sup>). Immediately after inserting the coacervate solution in the thermal  
181 trap (< 1 min), fluorescent microscopy images were taken every ~ 1 second. The images were analyzed  
182 with ImageJ or LabVIEW to determine the growth rate and the average droplet size at steady state (after  
183 1h of thermal gradient) at the interface (supplementary section 3). The final droplet size and the growth  
184 rate did not seem to be significantly affected by the initial polymer concentration.

185 In addition, we noticed that the variability in the size of the droplets between the experiments  
186 was large. This could be attributed to oscillatory salt fluctuations induced by the microscale water cycle,  
187 together with the intrinsic stochastic nature of droplet fusion. The salt fluctuations induced by microscale  
188 water cycles in our thermal trap were previously characterized and showed periodic salt oscillations and  
189 perturbative flows caused by water precipitation<sup>27</sup>. While salts are known to have a major impact on  
190 coacervation<sup>34,35</sup>, the effects of the salt oscillations on the coacervate droplets in the thermal trap do not  
191 appear to adversely affect the droplet stability, as the droplets stay intact at the interface. It is possible  
192 that the small fluctuations in salt concentration at the interface can induce local changes in the droplets'  
193 surface charge, influencing droplet fusion and droplet composition. However, it is clear that the droplets  
194 are stable under these salt conditions. We estimated a ~1% change in the bulk salt concentration  
195 accounting for total volume within the pore vs the volume of water that takes part in precipitation.  
196 Therefore, the high variability in droplets' size and composition that we observed during our analysis was  
197 likely due to variations in salt concentrations and the intrinsic stochastic nature of droplet fusion.

198 Despite this, in all instances (more than 50 different experiments that explored different  
199 coacervate conditions, starting concentrations and buffer conditions) we saw that the coacervate droplets  
200 accumulated and fused together, indicating that the accumulation, fusion and maintenance of the  
201 coacervate droplet at the gas water interface are general phenomena driven by the forces in the thermal  
202 trap rather than the chemistry of the coacervate dispersion.

203 We also performed experiments with starting polymer concentrations below the critical  
204 coacervate concentration (CCC), circa 1 mM for the CM-Dex:PDDA coacervate dispersions. At a starting  
205 concentration of 0.2 or 0.05 mM, no coacervate droplets were observed using optical microscopy within  
206 the resolution of our experiment, despite evident polymer up-concentration at the gas-water interface  
207 (supplementary section 3). Our results indicate that the thermal pore acts at the mechanical level to drive  
208 fusion of previously existing coacervate droplets followed by droplet division by stretching or  
209 fragmentation, and aggregation by wet-dry cycling.



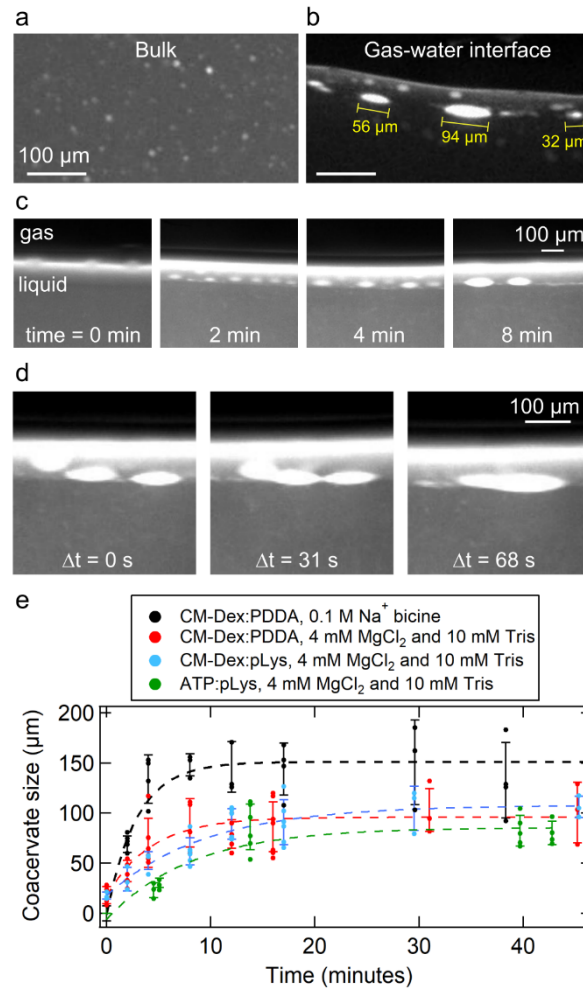

210

211 **Figure 3. Coacervate droplets accumulate and fuse at the gas-water interface.** a) Fluorescent microscopy images  
 212 of coacervate droplets in the bulk (a) and at the gas-water interface (b). c) Coacervate droplets at the interface after  
 213 different times in a thermal gradient ( $t=0$  min, 2 min, 4 min and 8 min). d) Microscopy images showing a fusion event  
 214 between three coacervates. e) Quantification of coacervate size over time for different buffer and coacervate  
 215 compositions. Each data point represents the mean and standard deviation of approximately 5 different larger  
 216 droplets at the gas-water interface. The dashed lines represent a phenomenological exponential fit.

217 We then wanted to verify that these observed phenomena were attributed to the gas-water  
 218 interface in combination with thermal flows. To this end, we undertook two control experiments. The first  
 219 determined the effect of convective flow alone i.e. in the absence of a gas bubble on the coacervate  
 220 droplets. To do this, coacervate dispersions (CM-Dex:pLys 2 mM ratio 4:1, [carboxyl]/[amine] = 7, 10 mM  
 221 Tris pH 8.0, 4 mM  $\text{MgCl}_2$ ) were loaded into a thermal trap without gas bubbles (hot side 49  $^{\circ}\text{C}$ , cold side  
 222 20  $^{\circ}\text{C}$ ). Time-resolved optical microscopy images showed that the bulk coacervate droplets ( $<15$   $\mu\text{m}$ ) were  
 223 transported in the bulk by the convection flow at a speed of about  $1.6 \pm 0.4$   $\mu\text{m}/\text{s}$  but did not undergo  
 224 fusion events in the bulk solution or accumulate within the trap (see supplementary section 4). We then  
 225 characterized the behavior of coacervate droplets within the thermal chamber in the absence of thermal  
 226 flow. At isothermal conditions, almost 100% of coacervate droplets within the pore slowly sedimented to  
 227 the bottom of the microfluidic chamber where the droplets fused to form a single coacervate droplet, as

228 expected under isothermal conditions<sup>18,19</sup>. In the presence of the thermal gradient, the convection flow  
229 in the bulk prevented the coacervate droplets from sedimenting by maintaining them within the  
230 thermophoretic flow. The fraction of droplets that survived sedimentation was proportionally dependent  
231 on the thermal gradient. Steeper thermal gradients induced faster convection and prevented the  
232 sedimentation of a larger fraction of droplets. Finite element simulations of the sedimentation of the  
233 coacervate droplets in a thermal trap with comparable thermal gradients to the experiments showed that  
234 droplet sedimentation reached steady state after 5 hrs and was maintained up to 30 hrs (supplementary  
235 section 5). In comparison, coacervate droplets at the gas-water interface resided at the interface even  
236 with very shallow temperature gradients.

237 Taken together, our results confirm that the flows at a gas-water interface led to the accumulation  
238 of coacervate droplets at the interface, fusion events between the droplets and to the maintenance of  
239 the droplets against sedimentation. In the absence of the thermal flow the droplets will sediment to the  
240 bottom of the pore. Therefore, the combination of convection and capillary flow at the interface  
241 maintained the droplets at the gas-water interface or circulating within the bulk for extended periods of  
242 time.

243

#### 244 **Droplet division at the gas-water interface**

245 Our data show that the opposing forces at the interface lead to the elongation of the droplets  
246 (Figure 3c-d). As an elliptical shape has been associated with the initial stages of vesicle division<sup>36</sup> we  
247 wondered whether the forces in our non-equilibrium setting would be strong enough to drive the elliptical  
248 deformation of the membrane-free coacervate droplet into a fission event.

249 We applied a temperature gradient of 19 °C (15°C-34°C) on a coacervate dispersion of  
250 CM-Dex:PDDA (molar ratio 6:1, [carboxyl]/[amine] = 5, total polymer concentration 2 mM, with 10 mM  
251 Tris pH 8, 4 mM MgCl<sub>2</sub>) doped with 0.1 % FITC-labeled CM-Dex. Time-resolved optical microscopy images  
252 showed that the coacervate droplets accumulated, fused and became elliptically elongated at the gas-  
253 water interface (Figure 3c-d). Excitingly, upon accumulation, droplets were progressively stretched along  
254 the interface until the droplet divided to produce two daughter protocells of a similar size (Figure 4a,  
255 supplementary movie 2). Our results confirm that elliptical deformation of the coacervate droplets at the  
256 interface do indeed drive droplet division. Droplet stretching and fission occurred as a consequence of the  
257 forces induced by the thermal gradient at the gas-water interface. In additional experiments, CM-Dex:pLys  
258 droplets also underwent fission events at the interface indicating that this is a general phenomenon that  
259 is driven by the physical forces rather than the chemistry or type of coacervate (supplementary section  
260 6).

261 In addition to convection and capillary forces at the interface, the presence of a gas bubble creates  
262 an environmental water cycle - this hypothetical prebiotic scenario may also have an effect on coacervate  
263 behavior and properties. For example, wet-dry cycles can lead to the accumulation, drying and  
264 rehydration of molecules at a surface. Previous studies<sup>27,28</sup> have shown that a heated gas bubble in contact  
265 with a cold surface within a thermal trap will simulate a microfluidic water cycle. Pure water from the bulk  
266 solution will evaporate at the hot side and condense on the cold surface. These water droplets will grow  
267 in size and fall back into solution. The evaporation, water condensation and re-entry into the bulk solution  
268 leads to decrease (evaporation) and increase (rain fall) of the interface height. We therefore sought to  
269 determine how such wet-dry cycles and water precipitations would affect the coacervate droplets.

270 To do this, a dispersion of coacervate microdroplets (CM-Dex:PDDA molar ratio 6:1,  
271 [carboxyl]/[amine] = 5, total polymer concentration 20 mM, 10 mM Tris pH 8, 4 mM MgCl<sub>2</sub>, doped with  
272 0.1 % FITC-labeled CM-Dex) was loaded into the thermal trap with a temperature gradient (hot side 34 °C,  
273 cold side 15 °C). Time-resolved optical microscopy images (Figure 4b and supplementary movie 3) showed  
274 that coacervate droplets accumulated at the gas-water interface and stacked to the warm surface of the  
275 trap as the height of the interface decreased from water evaporation. This had the effect of driving the  
276 accumulated coacervates into a quasi-dry state on the surface. The dry polymers (see arrow in Figure 4b)  
277 were later re-hydrated and the perturbative fluxes induced by the water precipitation led to their  
278 fragmentation. The resulting smaller daughter droplets fell into the bulk and circulated with the  
279 convection flow. These results show that water cycles can drive the fragmentation and fission of  
280 coacervate droplets. Again, additional experiments with CM-Dex:pLys mixtures showed that this process  
281 is general and can also take place when different types of coacervates are used (supplementary section  
282 6).

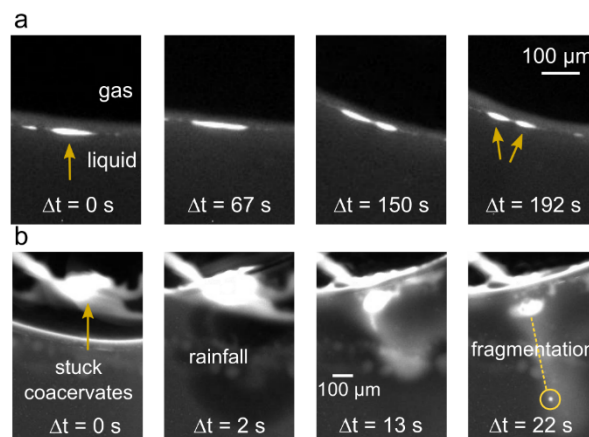

283

284 **Figure 4. Fission of coacervates induced by (a) interfacial forces and (b) fluxes caused by water precipitation.**  
285 *a) Fission of a coacervate droplet into two smaller droplets, induced by interfacial forces at the gas-liquid interface.*  
286 *The initial droplet (yellow arrow) is slowly stretched (over a time frame of minutes) at the interface until it divides*  
287 *into two smaller droplets. b) Rehydration of stuck coacervates can induce fission by fragmentation, due to the*  
288 *perturbative fluxes caused by precipitating water. It induces a fast mixing of the dry polymers that eventually*  
289 *fragment.*

290 Despite this, fission events were rarely observed. Out of a total of fifty-three experiments (average  
291 duration of ~2 hours each) which explored different polymer types, polymer concentrations, temperature  
292 gradients, buffers and trap geometries, we observed twelve division events. Of these twelve events, ten  
293 of them consisted of division by fragmentation (the type of Figure 4b). Two of them were of the type  
294 shown in Figure 4a. However, the division events may be happening more since we only image one of the  
295 many gas bubbles that were present in the chamber. Thus our count of droplet fissions may be  
296 underestimated. It is also important to note that our imaging protocol projected the view of the thermal  
297 trap on a 2D plane, and was therefore not able to distinguish objects or observe any dynamics in the  
298 perpendicular axis. In supplementary section 7, we thoroughly analyzed the experiment shown in Figure  
299 4a to rule out possible artifacts deriving from the imaging.

300 Taken together, our results show two mechanisms by which the out-of-equilibrium behaviour  
301 induced by the thermal gradient at the gas-water interface of a microfluidic pore can drive droplet fission.  
302 This represents a viable route to coacervate fission and subsequent evolution within the prebiotically

303 plausible scenario of a thermal pore.

304 Furthermore, to determine how robust the behaviour within the pore was, we characterized the  
305 effect of different temperature gradients ( $\Delta T$ s between 10 and 60 °C), trap thicknesses (between 127 and  
306 500  $\mu\text{m}$ ), and the volume of the gas bubbles (between 0.005 to 50  $\text{mm}^3$ ) on dispersions of coacervate  
307 droplets. Within these broad range of conditions, the features of coacervate accumulation, fusion, wet-  
308 dry cycles and divisions were observed. It appears that differences in these three parameters can affect  
309 the sedimentation and accumulation properties, fusion and division events and the quantity of dried  
310 polymers on the surface of the pore. For example, steep temperature gradients induce a fast convection  
311 in the bulk which prevents sedimentation and induces a fast capillary flow that promotes the fusion  
312 between the droplets. The increased wet-dry cycles also promote the division mechanism by  
313 fragmentation (Figure 4b). On the other hand, droplet division by stretching would benefit from shallower  
314 temperature gradients, because the droplet needs to be slowly stretched in order to divide (Figure 4a). In  
315 addition, steep temperature gradients will affect the size and frequency of water precipitations and,  
316 consequently, the extent at which the gas-water interface moves up and down during the evaporation /  
317 water condensation cycles that affect the quantity of dried polymers.

318 In summary, the general properties of accumulation, fusion and division, drying and coacervate  
319 reentry are observed across a broad range of experimental conditions such as temperature gradient, the  
320 chamber thickness and the gas to liquid ratio. Tuning these experimental parameters will tune the  
321 dynamic behavior of the droplets in the pore. This provides exciting and plausible evidence that our  
322 observed phenomena of flow induced droplet maintenance, accumulation, fusion and fission could have  
323 taken place within rocky environments of early Earth, which had pores of different sizes, incorporated  
324 bubbles of different dimensions and were subject to different thermal gradients.

325

### 326 **Separation and selection of coacervate phenotypes**

327 So far, we have determined the effect of the thermal trap with gas bubble on coacervates  
328 prepared from modified sugars, peptides and synthetic polymers. Despite the fact that PDDA was unlikely  
329 as a prebiotic molecule, we observed the general phenomena of accumulation, fusion, maintenance and  
330 fission by different mechanisms which appear independent of the chemical properties of the coacervate  
331 (Figure S2).

332 Recent studies have shown that compartmentalization by coacervation<sup>12,37</sup> or the hydrophobic  
333 effect with fatty acids<sup>38</sup> could complement the RNA world hypothesis by providing means to accumulate  
334 RNA and regulate RNA activity. Therefore, we wanted to determine the effect of the out-of-equilibrium  
335 dynamics of the thermal trap on dispersions of CM-Dex, pLys and RNA. To do this, dispersions of CM-Dex  
336 and pLys (molar ratio 4:1, [carboxyl]/[amine] = 7) with and without RNA (51 nt single-stranded, Figure 2e)  
337 were prepared at concentrations of 1.5 mM, 0.5 mM and from 0-5  $\mu\text{M}$  respectively in 10 mM Tris pH 8,  
338 4 mM  $\text{MgCl}_2$ . In order to study the co-localization between RNA, CM-Dex and pLys, dual-channel  
339 fluorescence imaging was used. RNA was labelled with ROX (Carboxy-X-rhodamine) while 0.1 % of the  
340 coacervate components (CM-Dex or pLys) contained a FITC label (see Figure 5a). The microscope was  
341 equipped with an image splitter (Optosplit II) containing the filterset for FITC and ROX to enable dual-  
342 channel fluorescence imaging.

343 After loading the dispersions of CM-Dex, pLys with RNA into the sample chamber, dual-channel  
344 fluorescence imaging showed that pre-formed small coacervate droplets (size < 15  $\mu\text{m}$ ) in the bulk  
345 colocalized RNA. Microscopy images showed that already prior to the thermal gradient, the droplets were

346 rich in RNA and pLys with a weak signal attributed to CM-Dex. This indicates that RNA strongly competes  
347 with CM-Dex to form droplets with pLys. Indeed, thermophoretic measurements to obtain the binding  
348 constants between RNA with pLys and CM-Dex with pLys confirmed a higher affinity of RNA to pLys  
349 compared to CM-Dex (see supplementary section 8). Fitting to the dose response curve, we found that  
350 the  $K_D$  of the RNA:pLys complex ( $K_D < 11$  nM) is an order of magnitude lower than the  $K_D$  of the  
351 CM-Dex:pLys complex ( $120$  nM  $< K_D < 400$  nM). This difference in  $K_D$  may be attributed to the fact that  
352 RNA has a higher charge density compared to CM-Dex. Therefore, whilst there is a small amount of  
353 CM-Dex within the droplet, CM-Dex will also be free in the coacervate dispersion. Upon inducing a thermal  
354 gradient (hot side  $34$  °C, cold side  $15$  °C), we observed the same phenomena as described previously i.e.  
355 that coacervate droplets accumulate at the interface and fuse together. Interestingly with the three  
356 coacervate components, dual fluorescence imaging of dispersions containing either FITC- labelled CM-Dex  
357 or pLys, with ROX labelled RNA showed that the droplets at the interface were larger and contained all  
358 three components (CM:Dex, RNA and pLys) (Figure 5a-c and supplementary movie 4) whilst the droplets  
359 in the bulk remained small and rich in RNA and pLys (Figure 5d-f). This observation is most likely due to  
360 the ability of the thermal trap to drive a strong accumulation of the RNA, pLys and CM-Dex in solution to  
361 the gas-water interface and induce an enrichment of the three components within the coacervate  
362 droplets, overcoming the equilibrium binding constants (supplementary section 8). Merging of the optical  
363 images shows that the microdroplets in the bulk have an overlap of the fluorescence signals of RNA and  
364 pLys (Figure 5d-f, supplementary section 9).

365 These results are important as they show that the thermal pore can generate and select for two  
366 different populations of coacervate droplets with different chemical compositions at the gas-water  
367 interface and within the bulk solution, which has not been previously reported upon.

368 We quantified the droplet size at the interface after applying the thermal gradient for 1 hour using  
369 the methodologies already described and as a function of RNA concentration. We observed that the final  
370 size of the coacervate protocells at the gas-water interface is inversely affected by RNA. In the presence  
371 of RNA, the average coacervate size dropped from  $69 \pm 31$   $\mu$ m down to  $25 \pm 9$   $\mu$ m (Figure 5g-j and  
372 Figure S8). As already shown in other studies<sup>39</sup>, a higher charge density can lead to the formation of  
373 smaller coacervate droplets. This is in fact what we observed, and we believe that the effect is driven by  
374 the stronger binding of RNA with pLys compared to CM-Dex with pLys.

375 The results show how the thermal trap can keep the coacervate droplets in a non-equilibrium  
376 state enabling energetically unfavorable interactions at the interface. This permits the formation and  
377 selection of two different populations of droplets within the pore with different physical properties and  
378 different compositions. We also show that the chemical composition of the coacervate droplets will affect  
379 their phenotype with smaller droplet size for increasing RNA concentration.

380  
381  
382  
383



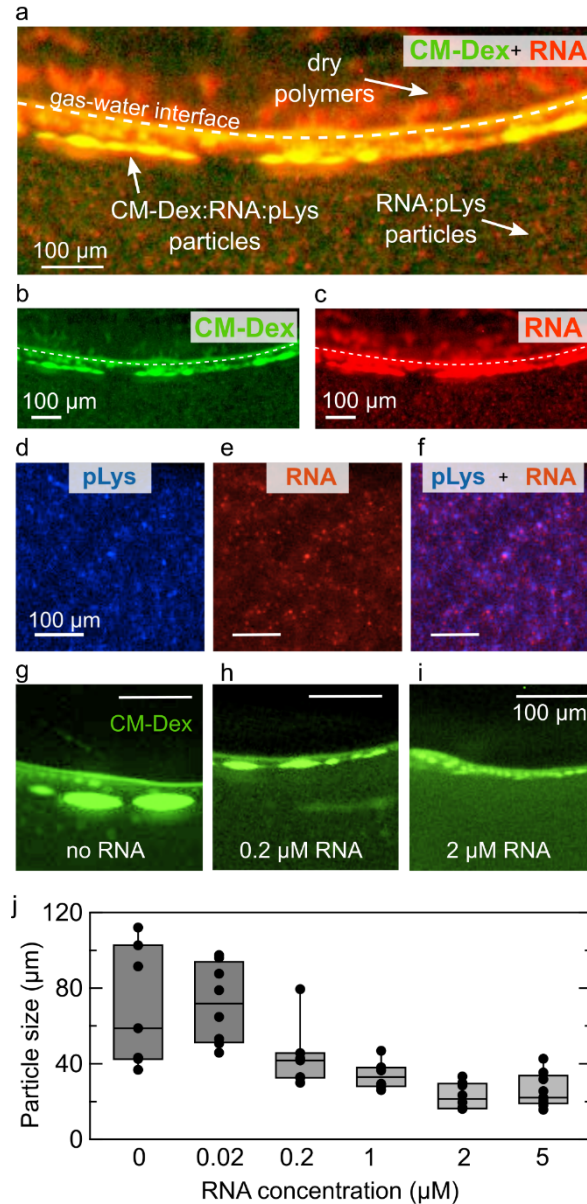

384

385 **Figure 5. The thermal trap creates and separates two populations of coacervate droplets.** a) Dual-channel  
 386 fluorescence images of the CM-Dex:pLys:RNA coacervates in the thermal trap. CM-Dex and RNA were differentially  
 387 labeled with FITC 0.1% and ROX 100%, respectively. The single pictures of the composite (a), are shown in (b) and (c),  
 388 respectively. Small droplets (< 15 μm) enriched in RNA and pLys are formed in the bulk. Droplets enriched of all three  
 389 components form instead at the gas-water interface. d) pLys channel (0.1% FITC-labelled), RNA channel (e) and  
 390 composite image (f), showing co-localization between RNA and pLys in the bulk droplets. (g) no RNA, (h) RNA 0.2 μM  
 391 and g) RNA 2 μM showing the droplets at the gas-water interface (CM-Dex fluorescence). h) Quantification of the  
 392 size of CM-Dex:pLys droplets as a function of RNA conc. The bars indicate the average size and standard deviation of  
 393 approximately 9 different coacervate droplets.

394

395

## Discussion

396

397

We showed that experimental primordial conditions - a millimeter-sized pore in a temperature gradient with a gas bubble - imparted specific selection pressures on dispersions of coacervate

398 microdroplets. The thermal gradient across the pore drove a convection flow within the bulk solution and  
399 instigated the accumulation and growth of the coacervate droplets by fusion at the gas-water interface.  
400 The forces in the heated rock-like pores hindered the sedimentation of the coacervate droplets and the  
401 formation of large coacervate macrophases whilst permitting the maintenance of cell-like sized  
402 coacervate microdroplets for longer times. These droplets were elongated due to convection and capillary  
403 forces and underwent division after deformation at the gas-water interface. In addition, we observed  
404 division as a consequence of a water cycle within the gas bubble. The water precipitations induced the  
405 division and fragmentation of the coacervate material accumulated on the surface of the pore. These  
406 features were not observed in thermal traps in the absence of gas bubbles or at isothermal temperature  
407 indicating that this was a unique property of the thermal gradient and the gas bubble. This is the first  
408 example of the accumulation, fusion, maintenance and fission of coacervate protocells. We showed that  
409 this is a general phenomenon as we observed the same processes in coacervates with different chemical  
410 compositions and buffer conditions. These results represent a possible mechanism for the growth and  
411 division of membrane-free protocells on primordial Earth.

412 We also showed that the  $K_D$  determined the affinity of polyelectrolytes to form coacervates where  
413 oligonucleotides (RNA) had a higher propensity to form coacervates with polypeptides (pLys) compared  
414 to modified sugars (CM-Dex). The coacervate microdroplets that we studied seemed to be selective  
415 towards RNA incorporation, a molecule which can be catalytic. In an origin of life scenario, this process  
416 could give a selective advantage in terms of catalysis within a pool of coacervate protocells. The thermal  
417 trap generated two different populations of coacervate droplets, where droplets poor in CM-Dex were  
418 maintained in the bulk solution whilst CM-Dex rich droplets formed and accumulated at the gas-water  
419 interface. This finding shows that the environment of a thermal trap with a gas bubble enables  
420 energetically unfavorable coacervate droplets to form by driving the system into an out-of-equilibrium  
421 state. As a consequence, the thermal trap was able to generate and contain populations of coacervate  
422 droplets which differ in the chemical composition and size and therefore physical properties. In the  
423 presence of active RNA these genotypic and phenotypic differences would most likely lead to different  
424 activities within the droplet. The droplets at the gas-water interface would benefit from additional  
425 variability and non-equilibrium properties: preferential enrichment of longer oligonucleotides<sup>28</sup>;  
426 enhanced strand separation at lower temperatures<sup>27</sup> (and therefore, lower hydrolysis rates); enhanced  
427 RNA catalysis induced by the presence of an additional polyanionic component that could lead to the  
428 change in material properties and the diffusion and reactions rates of RNA within the coacervate<sup>40</sup>.

429 This has important implications for demonstrating how thermal fluxes could have driven an  
430 evolutionary selection pressure on coacervate microdroplets giving experimental evidence for a key role  
431 within the origin of life scenario. In conclusion, our work shows that a temperature gradient with a gas  
432 bubble generates a unique environment for the accumulation, fusion, fission and selection of coacervate  
433 microdroplets. To the best of our knowledge this is the first time that these characteristics have been  
434 made accessible by physical forces alone - without chemical complexity or sophisticated machineries as  
435 seen in modern biology. This makes the gas bubble within a heated rock pore a compelling scenario to  
436 drive the evolution of membrane-free coacervate microdroplets on early earth.

437

## 438 **Materials and methods**

439 CM-Dex sodium salt (10-20 kDa or 150-300 kDa, monomer: 191.3 g/mol), pLys hydrobromide (4-15 kDa or  
440 150 kDa, monomer: 208.1 g/mol), and PDDA chloride (8.5 kDa, monomer: 161.5 g/mol), FITC-labelled pLys  
441 (15-30 kDa), FITC-labeled CM-Dex (15 kDa or 150 kDa), ATP (507.2 g/mol) were purchased from Sigma Aldrich  
442 Germany and used without further purification. Stock solutions of each of the coacervate components were

443 prepared to a concentration of 1 M in milliQ water and stored at -20 °C until further use. RNA oligonucleotides were  
444 purchased from biomers.net GmbH, with HPLC purification and re-dissolved to a final concentration of 100 µM in  
445 nuclease-free water. The sequence was (51 bases): 5' - UUA GCA GAG CGA GGU AUG T<sup>ROX</sup>AG GCG GGA CGC UCA GUG  
446 GAA CGA AAA CUC ACG. Every RNA strand was labeled with a ROX molecule (Carboxy-X-Rhodamine) positioned  
447 centrally in the sequence attached to the backbone of a Thymine and stored in pure nuclease-free water at a  
448 concentration of 100 µM.

449 The experiments were undertaken in a thin layer of PTFE (250 µm), which was cut with a defined geometry  
450 and then placed between a transparent sapphire and a copper back plate. The geometry of the PTFE sheet was  
451 designed to induce the incorporation of gas bubbles as shown in previous work<sup>27,28</sup>. The sapphire was in contact  
452 with a copper placeholder which was heated with rod resistors. The copper back plate was attached to an aluminum  
453 holder which was cooled with liquid water from a water bath (300F from JULABO). Temperature sensors (GNTP-SG  
454 from Thermofühler GmbH) were attached to the copper back plate and to the copper sapphire-holder to measure  
455 the outer temperatures of the cold and warm sides. The inner temperatures of the chamber were then calculated  
456 numerically based on the outer temperatures, the heat conductivities of the materials (coppers, silicon and sapphire)  
457 and their thickness. The outer warm target temperature was maintained constant via a PID loop implemented in  
458 LabVIEW, in order to control the output voltage to the rod resistors. The accuracy of the target temperatures was of  
459 ± 1 °C. The temperature differences that we used in the experiments shown here range from 15 to 30 °C.

460 Coacervate components were mixed together to the final desired concentration (2 to 20 mM) and  
461 immediately loaded into the microfluidic chamber. Dispersions of coacervates were prepared from either  
462 CM-Dex:PDDA or CM-Dex:pLys or CM-Dex:pLys: RNA in either 0.1 M Na<sup>+</sup> Bicine buffer (pH 8.5) or 10 mM Tris and 4  
463 mM MgCl<sub>2</sub> (pH 8.0). The chamber was then loaded onto a fluorescence microscope (see supplementary section 1),  
464 focused on the cold wall and images were taken every 1 to 10 seconds for arbitrary time (usually 1 to 2 hours) using  
465 custom-built software LabVIEW.

466 Imaging was performed with a standard custom-built fluorescence microscope, equipped with a blue LED  
467 (470/29 nm), an amber LED (590/14 nm), excitation filters (482/35 nm, 588/20 nm), a dualband-pass dichroic mirror  
468 (transmission edges at 505 nm and 606 nm), a 5X objective and an image splitter containing a longpass filter (600 nm)  
469 and emission filters (536/40 nm, 630/50 nm). This filterset allowed for the imaging of FITC (Fluorescein  
470 Isothiocyanate) and ROX (Carboxy-X-Rhodamine) respectively. The crosstalk between the channels was calculated  
471 following a standard protocol<sup>27</sup> (supplementary section 1). A Stingray-F145B ASG camera (ALLIED Vision  
472 Technologies GmbH) was used to acquire images. The voltage to the LEDs and the camera were controlled with the  
473 software LabVIEW (a scheme of the microscope is shown in figure S1). Image analysis of the droplets were  
474 undertaken using ImageJ or LabVIEW. The raw data from the two different illumination channels were merged  
475 together to generate the composite dual fluorescence image.

476  
477

## 478 **Acknowledgements**

479 Financial support came from: the European Research Council (ERC Evotrap, Grant Number 787356), the  
480 Simons Foundation (Grant Number 327125), the Quantitative Biosciences Munich Graduate School  
481 (QBM), MaxSynBio Consortium (jointly funded by the Federal Ministry of Education and Research  
482 (Germany) and the Max Planck Society), the MPI-CBG, the Cluster of Excellence Physics of Life of TU  
483 Dresden, EXC-1056 and the VW foundation (grant number 94743). We thank Lorenz Keil for sharing his  
484 expertise in the preparation of the setup for imaging and for programming support.

485

## 486 **Conflict of interest**

487 The authors declare no conflict of interest.

488

## 489 **References**

490 1. Mason, A. F. *et al.* Mimicking Cellular Compartmentalization in a Hierarchical Protocell through



- 491 Spontaneous Spatial Organization. *ACS Cent. Sci.* **5**, 1360–1365 (2019).
- 492 2. Sokolova, E. *et al.* Enhanced transcription rates in membrane-free protocells formed by  
493 coacervation of cell lysate. *Proc. Natl. Acad. Sci.* **110**, 11692–11697 (2013).
- 494 3. Oparin, A. I. The Origin of Life and the Origin of Enzymes. in *Advances in enzymology and related*  
495 *areas of molecular biology* **27**, 347–380 (Adv Enzymol Relat Areas Mol Biol, 2006).
- 496 4. Priftis, D., Laugel, N. & Tirrell, M. Thermodynamic Characterization of Polypeptide Complex  
497 Coacervation. *Langmuir* **28**, 15947–15957 (2012).
- 498 5. Koga, S., Williams, D. S., Perriman, A. W. & Mann, S. Peptide–nucleotide microdroplets as a step  
499 towards a membrane-free protocell model. *Nat. Chem.* **2011 39 3**, 720–724 (2011).
- 500 6. Tena-Solsona, M. *et al.* Kinetic Control over Droplet Ripening in Fuel-Driven Active Emulsions.  
501 (2019). doi:10.26434/CHEMRXIV.9978539.V1
- 502 7. Crosby, J. *et al.* Stabilization and enhanced reactivity of actinorhodin polyketide synthase minimal  
503 complex in polymer–nucleotide coacervate droplets. *Chem. Commun.* **48**, 11832 (2012).
- 504 8. McCall, P. M. *et al.* Partitioning and Enhanced Self-Assembly of Actin in Polypeptide Coacervates.  
505 *Biophys. J.* **114**, 1636–1645 (2018).
- 506 9. Nakashima, K. K., Vibhute, M. A. & Spruijt, E. Biomolecular chemistry in liquid phase separated  
507 compartments. *Frontiers in Molecular Biosciences* **6**, 21 (2019).
- 508 10. Beneyton, T., Love, C., Girault, M., Tang, T.-Y. D. & Baret, J. High-Throughput Synthesis and  
509 Screening of Functional Coacervates Using Microfluidics. *ChemSystemsChem* **2**, e2000022 (2020).
- 510 11. Tang, T.-Y. D. *et al.* Fatty acid membrane assembly on coacervate microdroplets as a step  
511 towards a hybrid protocell model. *Nat. Chem.* **6**, 527–533 (2014).
- 512 12. Drobot, B. *et al.* Compartmentalised RNA catalysis in membrane-free coacervate protocells. *Nat.*  
513 *Commun.* **9**, 3643 (2018).
- 514 13. Poudyal, R. R. *et al.* Template-directed RNA polymerization and enhanced ribozyme catalysis  
515 inside membraneless compartments formed by coacervates. *Nat. Commun.* **10**, 490 (2019).
- 516 14. Poudyal, R. R., Pir Cakmak, F., Keating, C. D. & Bevilacqua, P. C. Physical Principles and Extant  
517 Biology Reveal Roles for RNA-Containing Membraneless Compartments in Origins of Life  
518 Chemistry. *Biochemistry* **57**, 2509–2519 (2018).
- 519 15. Santos, M., Zintzaras, E. & Szathmáry, E. Origin of sex revisited. *Orig. Life Evol. Biosph.* **33**, 405–32  
520 (2003).
- 521 16. Hanczyc, M. M. & Szostak, J. W. Replicating vesicles as models of primitive cell growth and  
522 division. *Curr. Opin. Chem. Biol.* **8**, 660–664 (2004).
- 523 17. SMITH, A. E. & CHANCE, M. A. C. Coacervate Behaviour in an Alternating Electric Field. *Nature*  
524 **209**, 74–75 (1966).
- 525 18. Nakashima, K. K., Baaij, J. F. & Spruijt, E. Reversible generation of coacervate droplets in an  
526 enzymatic network. *Soft Matter* **14**, 361–367 (2018).
- 527 19. Mason, A. F., Buddingh, B. C., Williams, D. S. & Van Hest, J. C. M. Hierarchical Self-Assembly of a

- 528 Copolymer-Stabilized Coacervate Protocell. *J. Am. Chem. Soc.* **139**, 17309–17312 (2017).
- 529 20. Schafer, K. A. The Cell Cycle: A Review. *Vet. Pathol.* **35**, 461–478 (1998).
- 530 21. Beltrán-Heredia, E., Almendro-Vedia, V. G., Monroy, F. & Cao, F. J. Modeling the Mechanics of  
531 Cell Division: Influence of Spontaneous Membrane Curvature, Surface Tension, and Osmotic  
532 Pressure. *Front. Physiol.* **8**, 312 (2017).
- 533 22. Zhu, T. F., Adamala, K., Zhang, N. & Szostak, J. W. Photochemically driven redox chemistry  
534 induces protocell membrane pearling and division. *Proc. Natl. Acad. Sci. U. S. A.* **109**, 9828–32  
535 (2012).
- 536 23. Kudella, P. W. *et al.* Fission of Lipid-Vesicles by Membrane Phase Transitions in Thermal  
537 Convection. *Sci. Rep.* **9**, 18808 (2019).
- 538 24. Pal, A. & Khakhar, D. V. Breakage of vesicles in a simple shear flow. *Soft Matter* **15**, 1979–1987  
539 (2019).
- 540 25. Zwicker, D., Seyboldt, R., Weber, C. A., Hyman, A. A. & Jülicher, F. Growth and division of active  
541 droplets provides a model for protocells. *Nat. Phys.* **13**, 408–413 (2017).
- 542 26. Agerschou, E. D., Mast, C. B. & Braun, D. Emergence of Life from Trapped Nucleotides? Non-  
543 Equilibrium Behavior of Oligonucleotides in Thermal Gradients. *Synlett* **28**, 56–63 (2017).
- 544 27. Ianeselli, A., Mast, C. B. & Braun, D. Periodic Melting of Oligonucleotides by Oscillating Salt  
545 Concentrations Triggered by Microscale Water Cycles Inside Heated Rock Pores. *Angew. Chemie*  
546 *Int. Ed.* (2019). doi:10.1002/anie.201907909
- 547 28. Morasch, M. *et al.* Heated gas bubbles enrich, crystallize, dry, phosphorylate and encapsulate  
548 prebiotic molecules. *Nat. Chem.* **1** (2019). doi:10.1038/s41557-019-0299-5
- 549 29. Ukmar-Godec, T. *et al.* Lysine/RNA-interactions drive and regulate biomolecular condensation.  
550 *Nat. Commun.* **10**, 2909 (2019).
- 551 30. Dora Tang, T. Y. *et al.* Fatty acid membrane assembly on coacervate microdroplets as a step  
552 towards a hybrid protocell model. *Nat. Chem.* **6**, 527–533 (2014).
- 553 31. Moreau, N. G., Martin, N., Gobbo, P., Tang, T. Y. D. & Mann, S. Spontaneous membrane-less  
554 multi-compartmentalization: Via aqueous two-phase separation in complex coacervate micro-  
555 droplets. *Chem. Commun.* **56**, 12717–12720 (2020).
- 556 32. Donau, C. *et al.* Active coacervate droplets as a model for membraneless organelles and  
557 protocells. *Nat. Commun.* **11**, 1–10 (2020).
- 558 33. Love, C. *et al.* Reversible pH-Responsive Coacervate Formation in Lipid Vesicles Activates  
559 Dormant Enzymatic Reactions. *Angew. Chemie Int. Ed.* **59**, 5950–5957 (2020).
- 560 34. Van Der Kooij, H. M. *et al.* On the stability and morphology of complex coacervate core micelles:  
561 From spherical to wormlike micelles. *Langmuir* **28**, 14180–14191 (2012).
- 562 35. Perry, S., Li, Y., Priftis, D., Leon, L. & Tirrell, M. The Effect of Salt on the Complex Coacervation of  
563 Vinyl Polyelectrolytes. *Polymers (Basel)*. **6**, 1756–1772 (2014).
- 564 36. Urakami, N., Jimbo, T., Sakuma, Y. & Imai, M. Molecular mechanism of vesicle division induced by  
565 coupling between lipid geometry and membrane curvatures. *Soft Matter* **14**, 3018–3027 (2018).

- 566 37. Mountain, G. A. & Keating, C. D. Formation of Multiphase Complex Coacervates and Partitioning  
567 of Biomolecules within them. *Biomacromolecules* **21**, 630–640 (2020).
- 568 38. Cornell, C. E. *et al.* Prebiotic amino acids bind to and stabilize prebiotic fatty acid membranes.  
569 *Proc. Natl. Acad. Sci. U. S. A.* **116**, 17239–17244 (2019).
- 570 39. Vieregg, J. R. *et al.* Oligonucleotide-peptide complexes: Phase control by hybridization. *J. Am.*  
571 *Chem. Soc.* **140**, 1632–1638 (2018).
- 572 40. Poudyal, R. R., Keating, C. D. & Bevilacqua, P. C. Polyanion-Assisted Ribozyme Catalysis Inside  
573 Complex Coacervates. (2019). doi:10.1021/acscchembio.9b00205
- 574
